# Supplementary material for: The normalization model predicts responses in the human visual cortex during object-based attention
Source: eLife. 2023 Apr 26;12:e75726. doi: 10.7554/eLife.75726 (PMC10229119; doi:10.7554/eLife.75726)
Supplement: Supplementary file 1. [file elife-75726-supp1.xlsx]

## Sheet: Sheet1
ROI	Percentage of voxels with consistent preference
V1	71
LO	68
pFs	66
EBA	91
PPA	81
