# Supplementary material for: The normalization model predicts responses in the human visual cortex during object-based attention
Source: eLife. 2023 Apr 26;12:e75726. doi: 10.7554/eLife.75726 (PMC10229119; doi:10.7554/eLife.75726)
Supplement: Supplementary file 2. [file elife-75726-supp2.xlsx]

## Sheet: Sheet1
ROI	ΔAICsum – normalization	ΔAICaverage – normalization	ΔAICsum – average
V1	28	23.6	4.4
LO	30.2	24.2	6
pFs	29.5	24.3	5
EBA	29.3	24.2	5.1
PPA	27.6	24.7	3
