# Supplementary material for: The normalization model predicts responses in the human visual cortex during object-based attention
Source: eLife. 2023 Apr 26;12:e75726. doi: 10.7554/eLife.75726 (PMC10229119; doi:10.7554/eLife.75726)
Supplement: Supplementary file 3. [file elife-75726-supp3.xlsx]

## Sheet: Sheet1
ROI	β odd	β even
V1	1.005	1.006
LO	1.015	1.021
pFs	1.013	1.017
EBA	1.011	1.016
PPA	1.012	1.017
