# Supplementary material for: The normalization model predicts responses in the human visual cortex during object-based attention
Source: eLife. 2023 Apr 26;12:e75726. doi: 10.7554/eLife.75726 (PMC10229119; doi:10.7554/eLife.75726)
Supplement: Supplementary file 4. [file elife-75726-supp4.xlsx]

## Sheet: Sheet1
ROI	β odd	β even
V1	1.048	1.052
LO	1.117	1.129
pFs	1.092	1.099
EBA	1.071	1.079
PPA	1.037	1.040
