# Supplementary material for: The normalization model predicts responses in the human visual cortex during object-based attention
Source: eLife. 2023 Apr 26;12:e75726. doi: 10.7554/eLife.75726 (PMC10229119; doi:10.7554/eLife.75726)
Supplement: Supplementary file 5. [file elife-75726-supp5.xlsx]

## Sheet: Sheet1
ROI	β odd	β even	LP odd	LP even	LN odd	LN even	σ odd	σ even
V1	2.75	2.61	5.52	5.65	3.37	3.45	3.92	3.87
LO	3.80	3.71	4.84	4.87	3.75	3.78	3.01	3.11
pFs	4.11	3.86	5.22	5.32	3.84	3.66	3.62	3.66
EBA	3.14	3.12	5.39	5.42	1.96	1.95	3.60	3.69
PPA	3.55	3.13	6.13	6.32	1.81	1.79	5.79	5.77
