# Supplementary material for: The normalization model predicts responses in the human visual cortex during object-based attention
Source: eLife. 2023 Apr 26;12:e75726. doi: 10.7554/eLife.75726 (PMC10229119; doi:10.7554/eLife.75726)
Supplement: Supplementary file 8. [file elife-75726-supp8.xlsx]

## Sheet: Sheet1
ROI	βP odd	βP even	βN odd	βN even	αP odd	αP even	αN odd	αN even	Saturation odd	Saturation even
V1	3.66	3.36	2.35	2.60	0.73	0.68	0.49	0.54	3.08	3.14
LO	4.43	4.30	3.51	3.69	0.74	0.69	0.54	0.59	3.31	3.30
pFs	4.11	3.97	2.89	3.03	0.71	0.65	0.49	0.55	3.30	3.33
EBA	4.57	4.57	2.09	2.21	0.72	0.70	0.34	0.35	3.12	3.18
PPA	3.11	3.02	1.17	1.25	0.54	0.52	0.18	0.21	3.09	3.49
