# Supplementary figures and images for: The normalization model predicts responses in the human visual cortex during object-based attention
Source: eLife journal article supplement (doi:10.7554/elife.75726), 2023-04-26

a

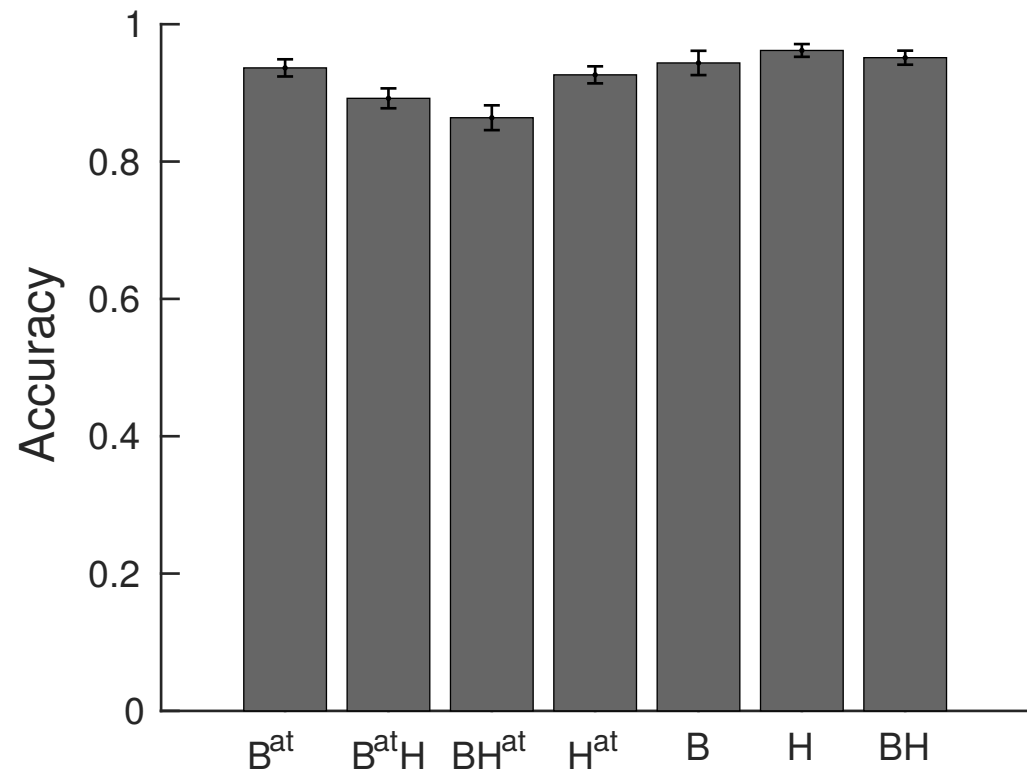

b

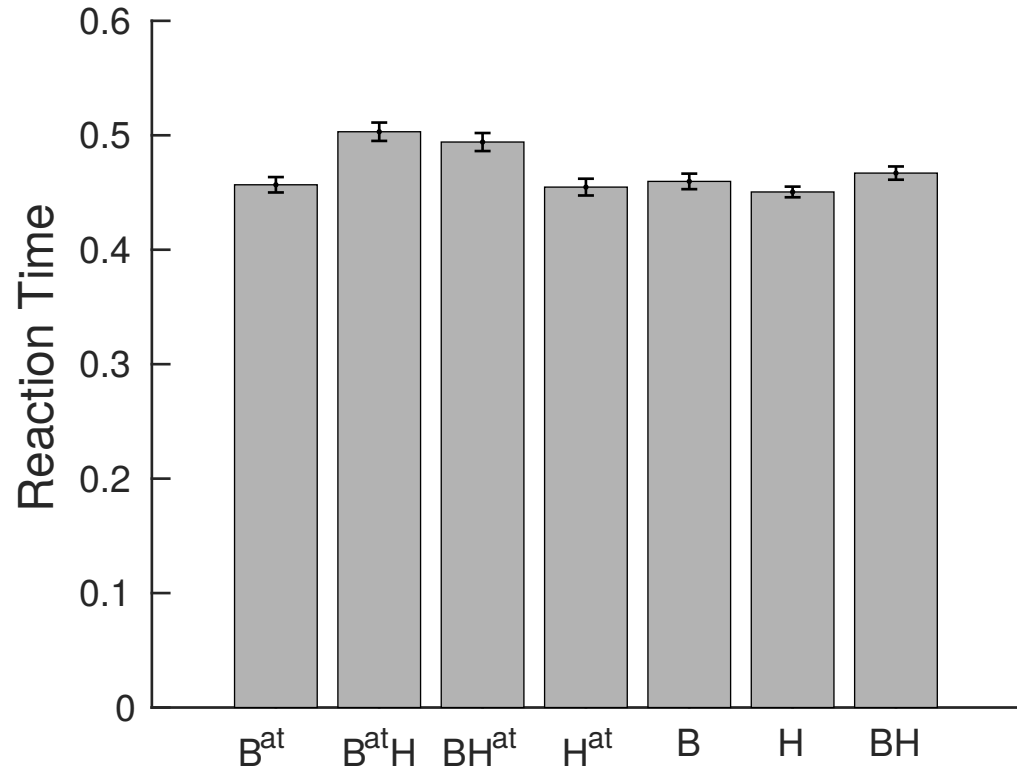

Supplement: supp [file elife-75726-supp-v1.zip]

a

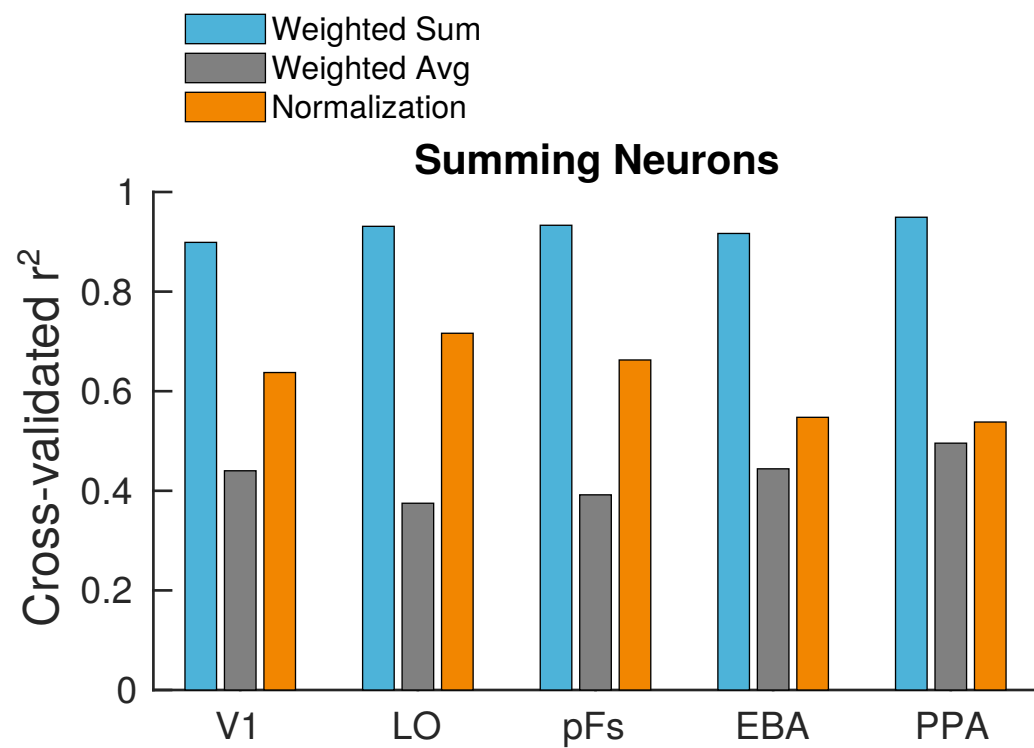

b

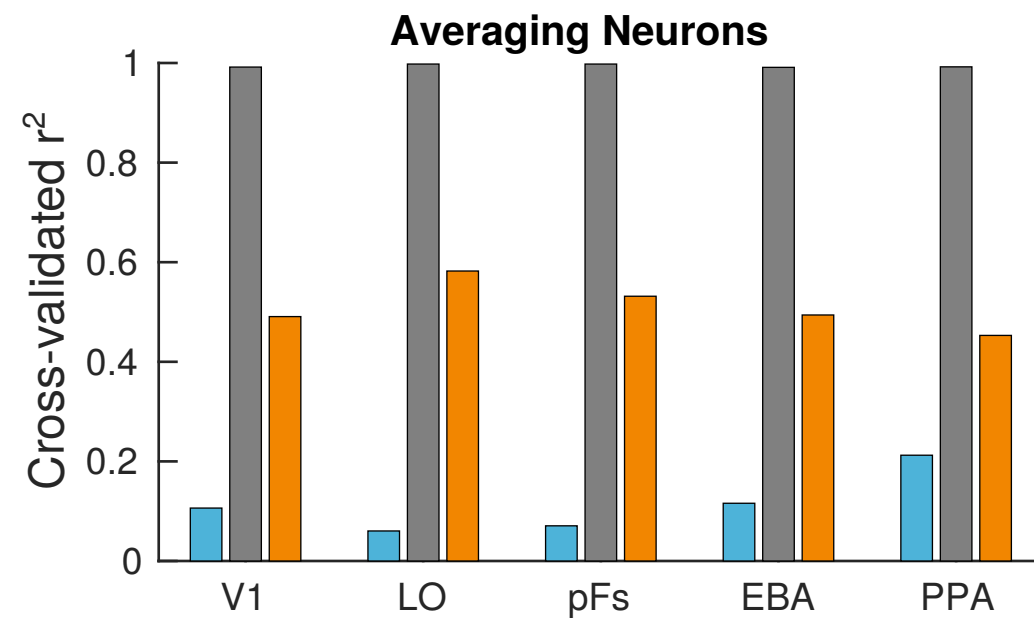

c

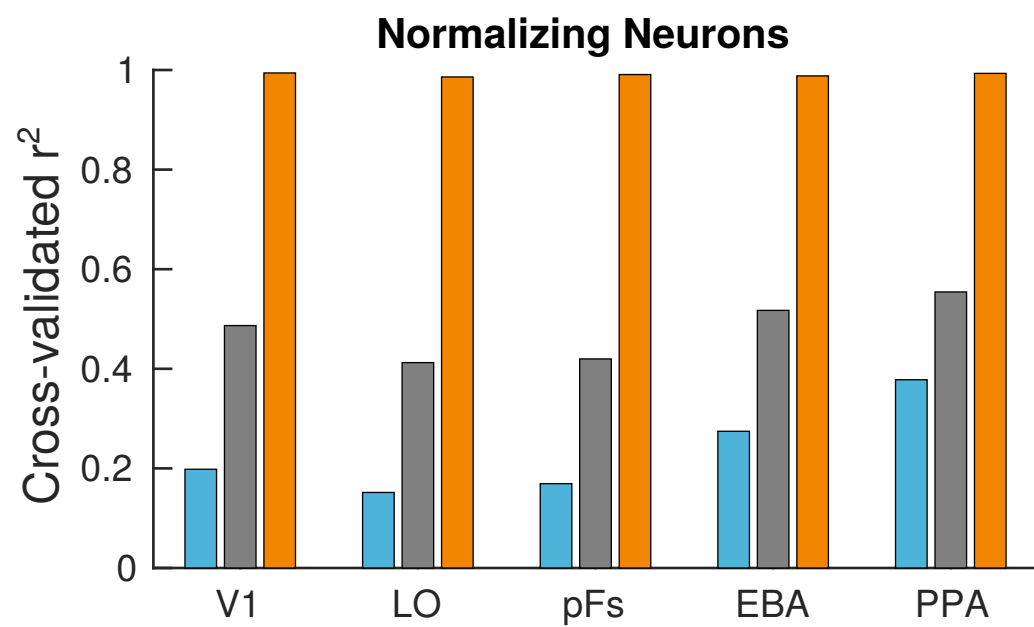

Supplement: supp [file elife-75726-supp-v1.zip]

a

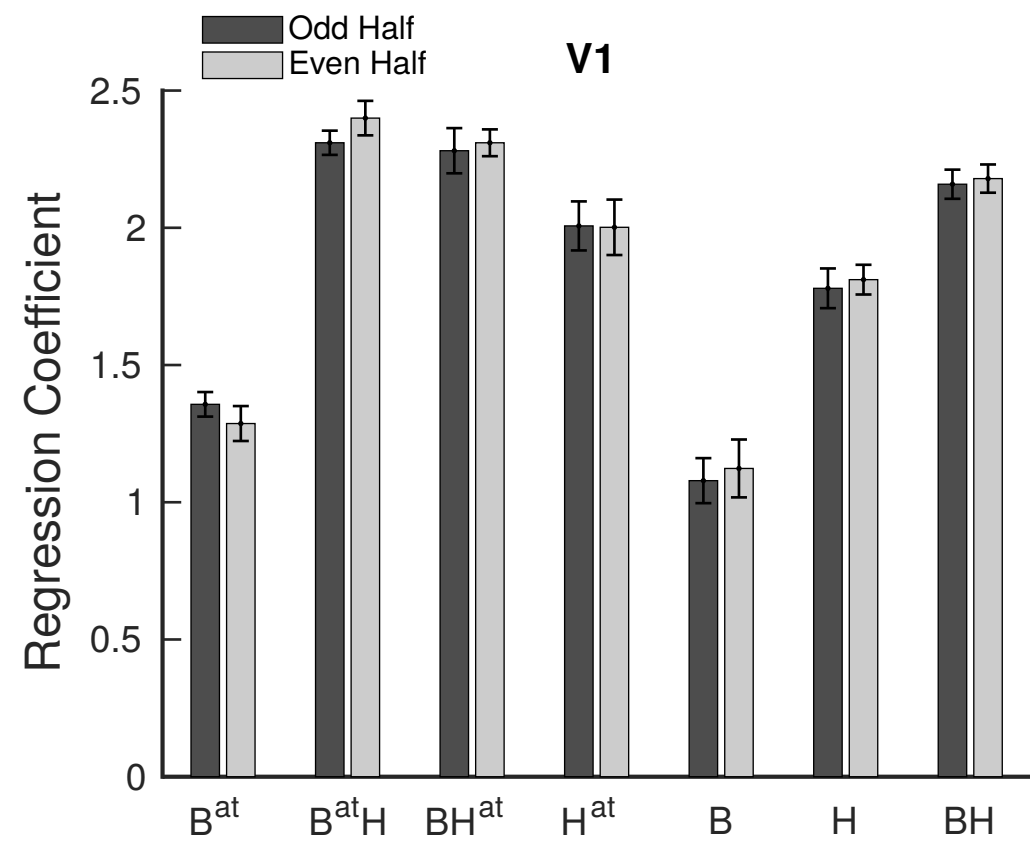

b

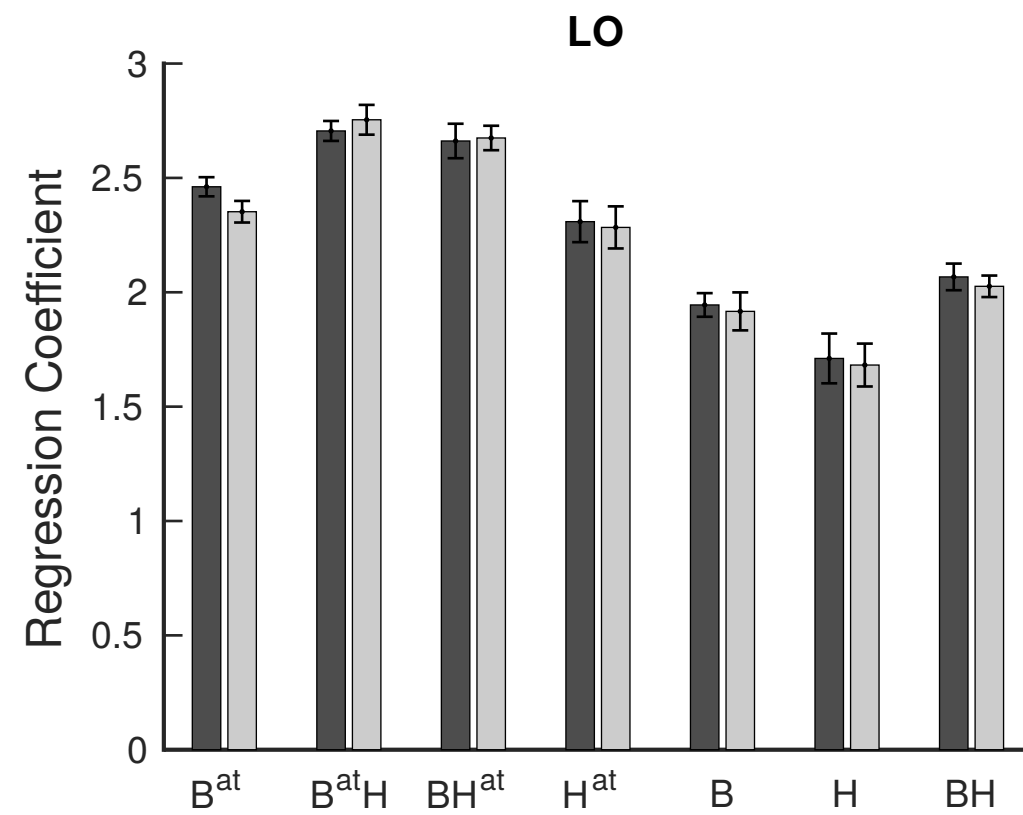

c

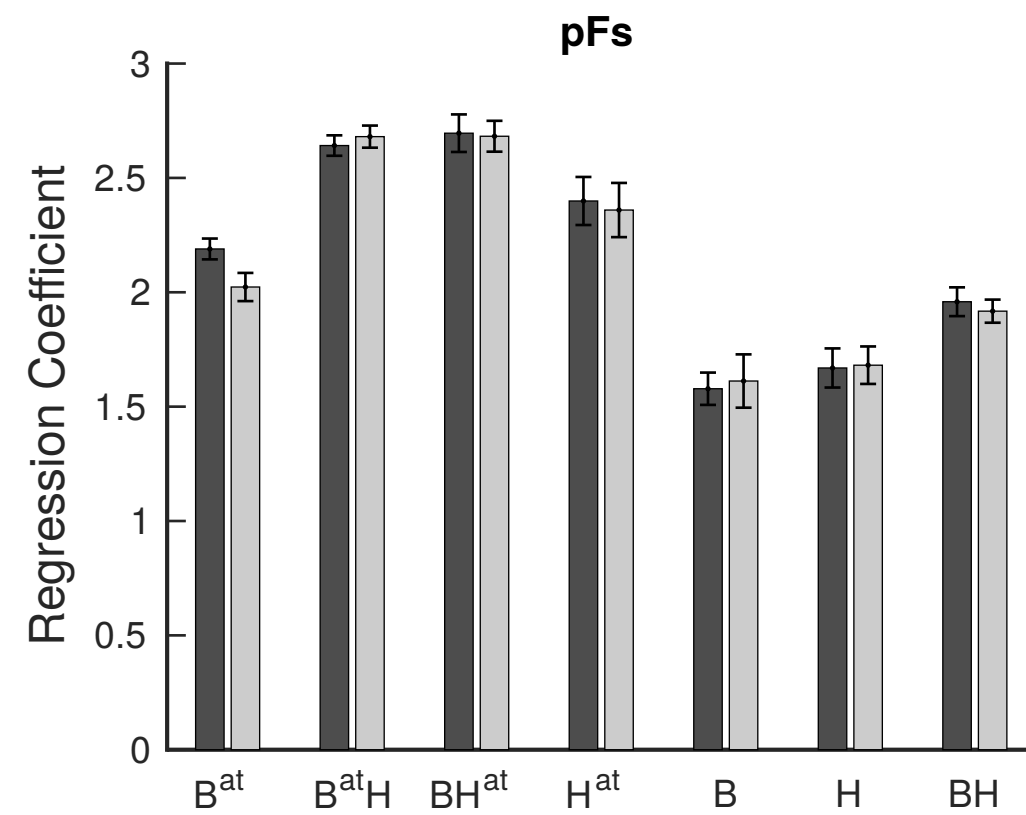

d

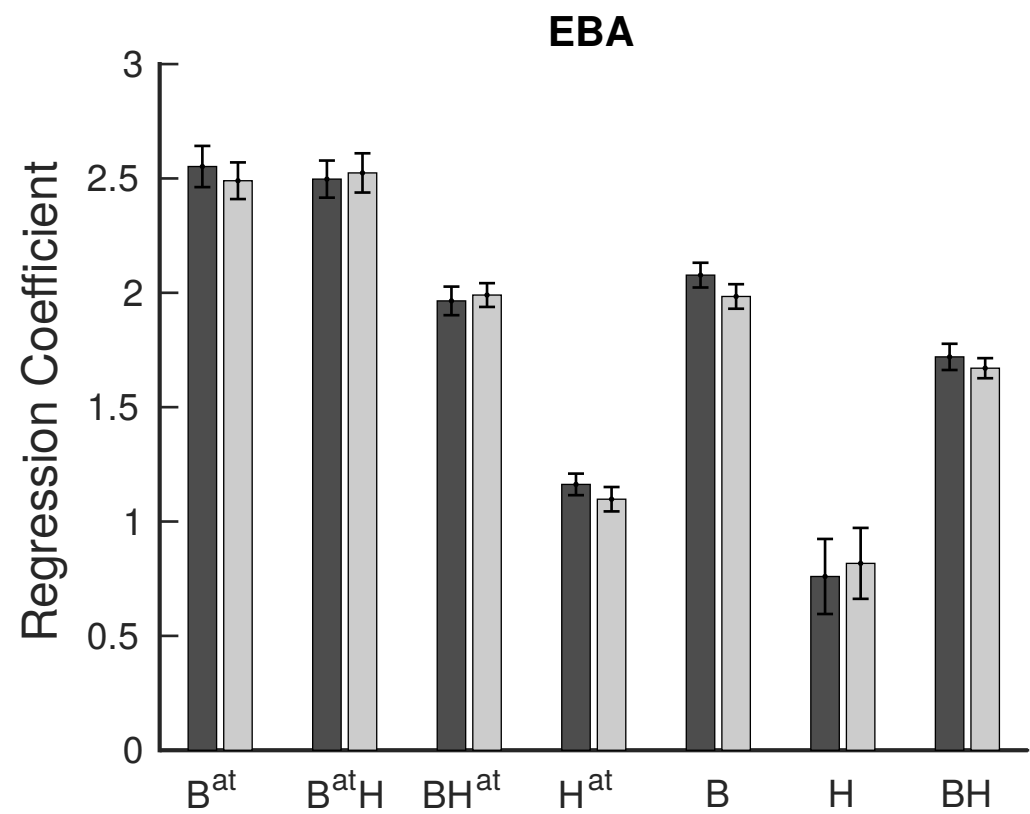

e

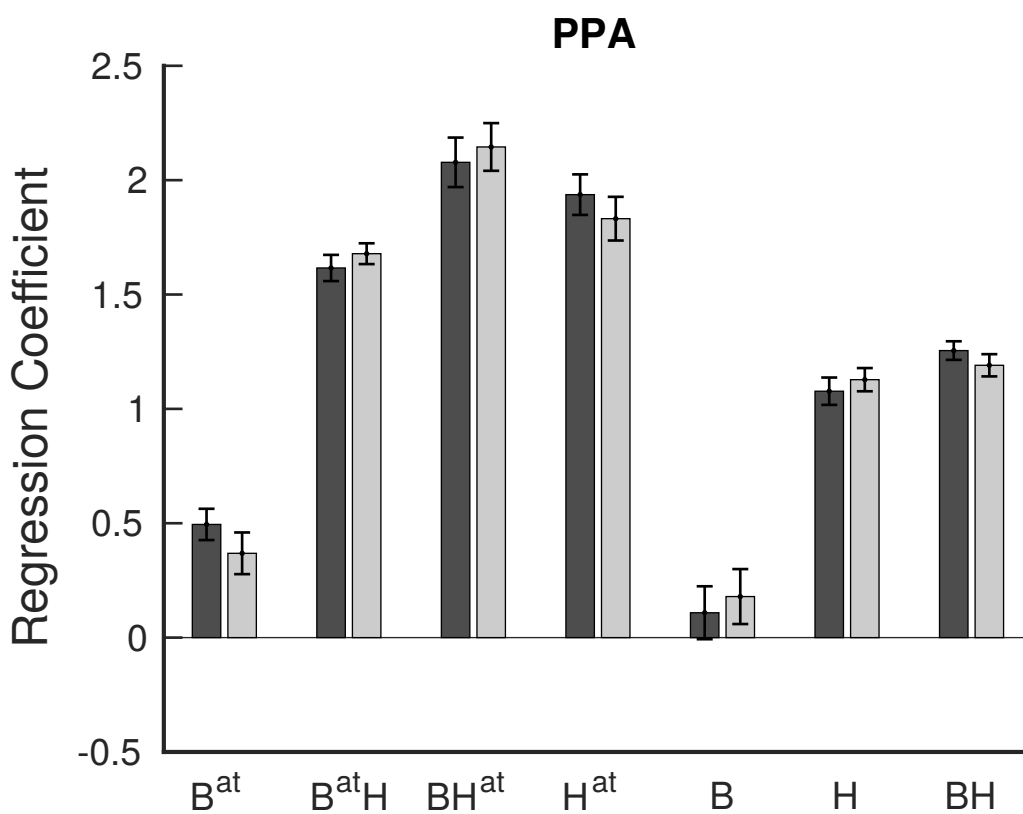

f

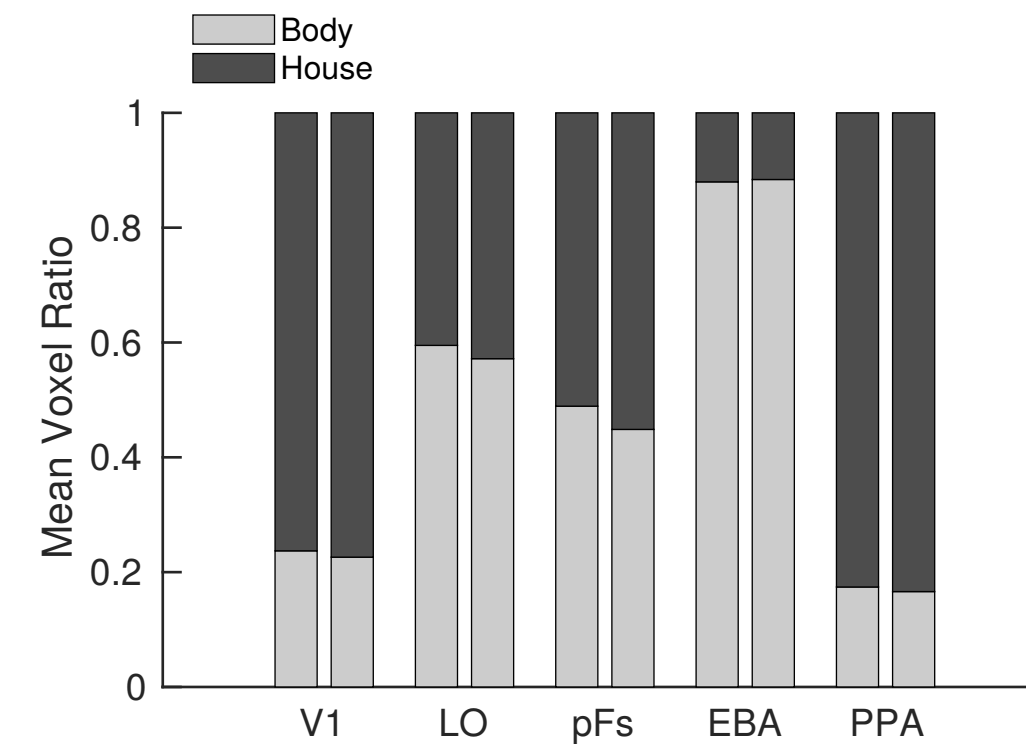

Supplement: supp [file elife-75726-supp-v1.zip]

a

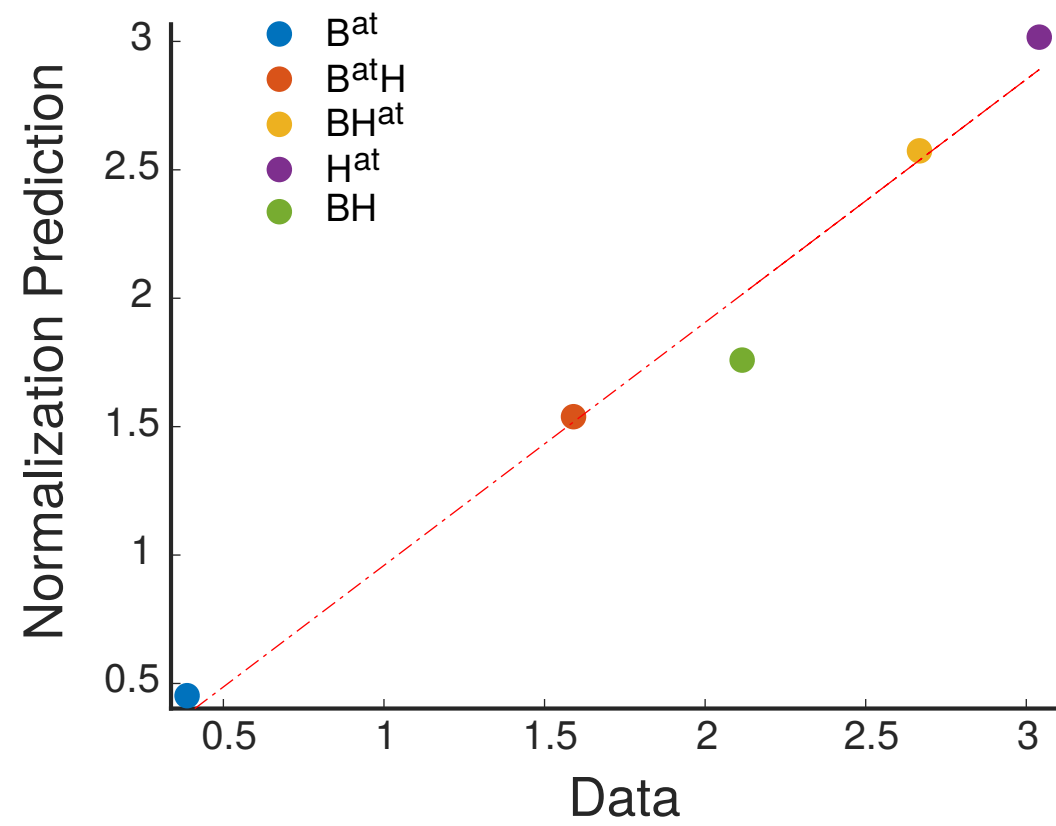

b

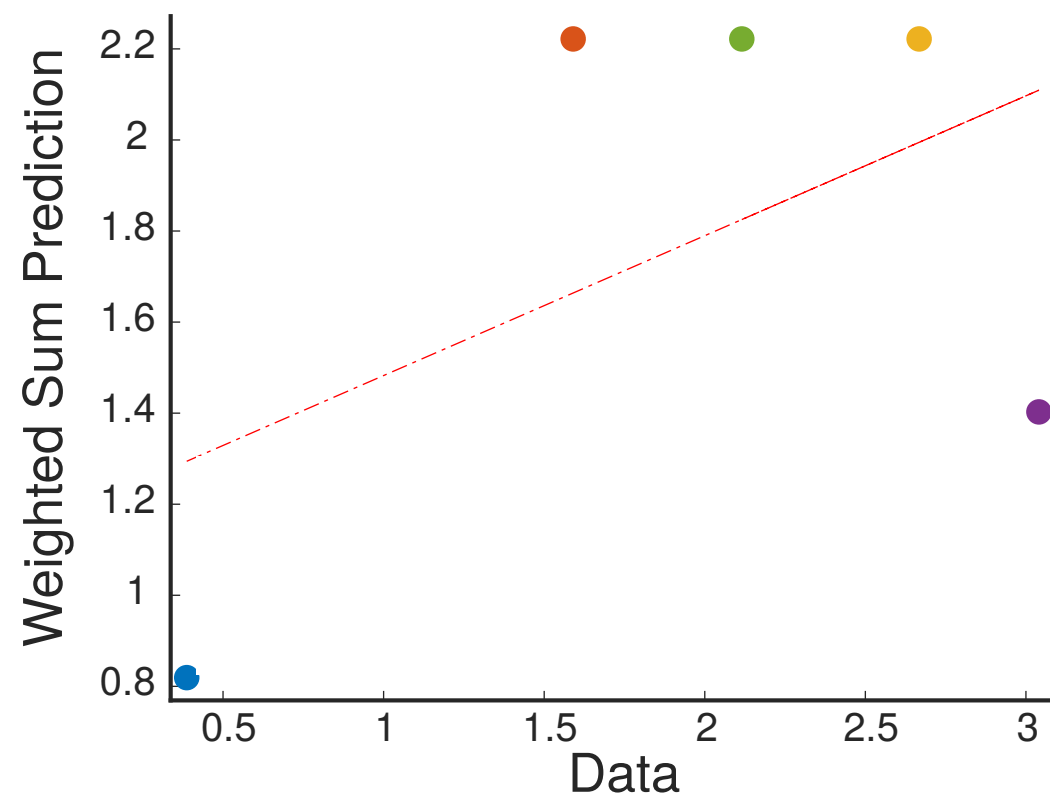

c

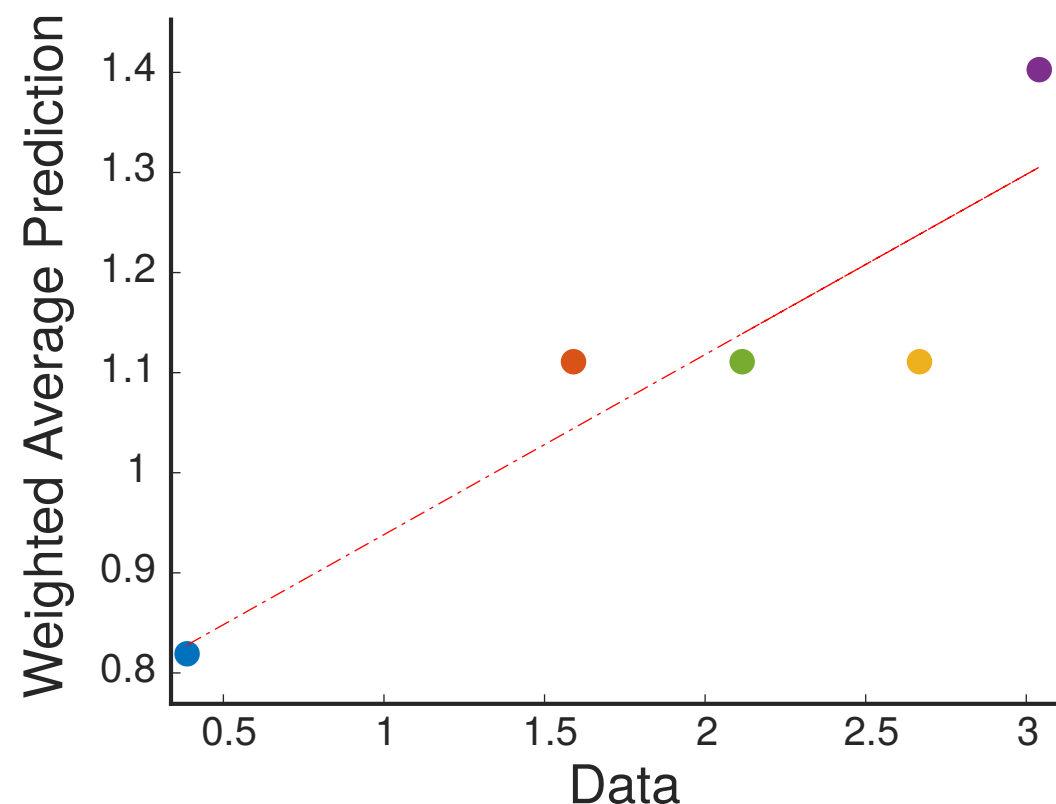

Supplement: supp [file elife-75726-supp-v1.zip]
